# Supplementary material
Source: bioRxiv or medRxiv preprint supplement (https://medrxiv.org/highwire/filestream/97921/field_highwire_adjunct_files/0/2020.09.21.20196220-1.pdf)
Supplement: Supplementary file [file 2020.09.21.20196220-1.pdf]

Supplementary Materials for  
**Privacy-Protecting, Reliable Response Data Discovery Using COVID-19  
Patient Observations**

Jihoon Kim<sup>†</sup>, Larissa Neumann<sup>†</sup>, Paulina Paul, Michael Aratow, Douglas S. Bell, Jason N. Doctor, Ludwig C. Hinske, Xiaoqian Jiang, Katherine K. Kim, Michael E. Matheny, Daniella Meeker, Mark J. Pletcher, Lisa M. Schilling, Spencer SooHoo, Hua Xu, Kai Zheng, Lucila Ohno-Machado\* for the R2D2 Consortium

<sup>†</sup>These authors contributed equally to this work.

\*Correspondence to: [lohnomachado@health.ucsd.edu](mailto:lohnomachado@health.ucsd.edu)

**This PDF file includes:**

Materials and Methods  
Figs. S1 to S5  
Tables S1 to S5  
R2D2 Consortium Members

## Materials and Methods

Our approach is practical and generalizable: The network can be repurposed to any other disease of interest, as it is not based exclusively on data elements deemed relevant for COVID-19. Because privacy protection is at the core of our network, a wide range of institutions can participate. We provide a rapidly deployable and reproducible alternative or complement to centralized registries of EHR data that allows healthcare institutions to stay in control of their data. The development of our Q&A system involved the inclusion of new concept codes in local repositories, agreement on concept definitions (e.g., what constitutes a *COVID-19 hospitalization*, what codes should be included in the definition of *History of Coronary Heart Disease*, and how to map laboratory test records into LOINC, for which we developed a mapping tool) (21). Instead of centralizing data at the Consortium Hub, we focus on interpreting and clarifying the research questions in order to determine the data elements required. Our teams analyze these data elements to generate aggregate statistics at the various institutions, documenting the specific version of structured query language (SQL) code executed at a specific time point to generate their answers. In addition to basic counts and proportions, to adjust for confounders, we use distributed multivariate analyses to estimate risk-adjusted odds ratios. This is done in a synchronized fashion for iterative federated algorithms, such as one previously reported for building a logistic regression model (11). We have shown previously that a model obtained this way is identical to one built using data that are centralized in a single location.

### Workflow

Fig. S1 shows our general workflow, including human interpretation and clarification of questions, human quality control of answers, and using graphs and related visualizations as much as possible. The responsibility of the Lead Site--to create a template query for all responding sites to use for rapid response--rotates among institutions (i.e., Health Systems). A more detailed workflow is illustrated in Fig. S2 using a swim-lane format with an emphasis on roles. The Q&A process starts when a user creates a request through the public web-site, <https://covid19questions.org>. Next, the data scientist at the Consortium Hub checks if this question had been answered before and pass it on to the clinician at the Consortium Hub to assess the feasibility (i.e., if the received question is answerable from the local data mart) and assigns it to one of the 12 institutions as a Lead Site. Throughout the whole process, the tracking system is used to report an issue to assignees, respond to the issue, update the code and results, and prompt to re-run the updated SQL. Next, another clinician at the Lead Site will work with database analyst to review and develop concept set. This is an iterative process within the Lead Site, to develop concept set, create SQL, generate results, and evaluate the results against the EHR records including chart reviews. The outputs of Lead Site level process are a template query (.sql format) and a template output (.csv format), which are uploaded to the shared code repository. Once 11 Responding Sites get notification emails about the template query and format for the results, their database analysts will run the template SQL to get preliminary results, and review these against their EHR data with clinicians.

This part of the process is where the Responding Site most frequently runs into errors, challenges, and requires troubleshooting. For example, when missing concepts like D-Dimer or blood type, illustrated in Fig. S3, are discovered, the database analyst at the Responding Site creates an issue in the tracking system and resolves this with the database analyst and the clinician at the Leading Site. Since there are 11 sites, this means the Lead Site coordinates the

concept set and SQL development through one-on-one sessions between the Lead Site and Responding Site. Through this iterative process among 12 sites, the concept set and SQL keep being updated and keep improving their sensitivity and specificity to identify the right patients and hospitalization encounter records. This involves rewriting and updating existing Extract-Transform-Load (ETL) scripts to map source EHR data to target the common data model (CDM), which in our case is the Observational Medical Outcomes Partnership -- OMOP). The institutions with the same EHR system or database management system share common experience and knowledge to help each other develop ETL scripts together and evaluate the OMOP query results against EHRs.

Once all Responding Sites have uploaded their site level results, the Data Scientist at Consortium Hub merges these results into a single file. A generic and extensible format for site-level summary result is used to answer general epidemiology and clinical research questions (Fig. S4). Then a data quality check is conducted. While use of a CDM in a large clinical data research network is a widely used approach to enable interoperable query development, a query formulated in one institution may not return accurate results in another due to variations in data integration and data quality differences. Several rounds of confirmations and checks with data analysts and clinical informaticians at each institution are often necessary to answer questions with confidence. There are many potential sources of errors and Table S1 displays selected examples of data quality checks with real issues. The check types are based on PEDSnet framework (22) and revised to fit our project's specific needs. The Data Scientist resolves issues together with the Lead Site and the Responding Site. When the aggregate results pass the quality control (QC) test, the Consortium Hub Clinician conducts the final review to ensure its clinical relevancy. Finally, if the clinician approves the release of the result, the Data Scientist uploads the answer to the public web-site (<https://covid19questions.org>) and notifies the requestor via an email.

### Cohort and Concept Set

As questions frequently refer to the same subsets of patients, we developed electronic cohort definitions that facilitate our answers. We followed the United States Centers for Disease Control and Prevention (CDC) guideline (23) and the National COVID-19 Cohort Collaborative (9) and Observational Health Data Sciences and Informatics (OHDSI) approaches (24) to develop a cohort of hospitalization encounters for COVID-19 as a base for all inpatient questions. Fig. S3A displays the electronic phenotyping of adults hospitalized with COVID-19 derived by canonical SQL scripts. Hospitalization encounters were identified by using the following concepts stored in the OMOP <VISIT\_OCCURRENCE> table: Emergency Room and Inpatient Visit (Concept Id 262), Inpatient Visit (Concept Id 92021) or Intensive Care (Concept Id 32037). To enter the COVID-19 hospitalization cohort, all four inclusion criteria needed to be met:

- 1) a minimum age of 18 years at the date of hospitalization,
- 2-3) a hospitalization without a length of stay requirement on or after January 1, 2020 and
- 4) at least one occurrence of
  - a) a positive viral test for SARS-CoV-2, or
  - b) a COVID-19 related diagnosis between the interval of 21 days prior to hospitalization and hospital encounter discharge.

The following concepts of the OMOP <MEASUREMENT> table for the definition of a positive viral test for SARS-COV-2 were used:

- 1) the occurrence of the pre-coordinated measurement Concept (Concept Name: 2019 novel coronavirus detected, Concept Id: 37310282), or
- 2) the occurrence of at least one concept for a SARS-CoV-2 viral test (e.g. Concept Name: SARS-CoV-2 (COVID19) RNA [Presence] in Respiratory specimen by NAA with probe detection, Concept Id: 706163) and at least one *value\_as\_concept\_id* for a positive result (e.g. Concept Name: Positive, Concept Id: 45884084).

For identification of COVID-19 related diagnoses, we included the following ICD-10-CM Codes: Other coronavirus as the cause of diseases classified elsewhere (B97.29), COVID-19, virus identified (U07.1), Pneumonia (J12.89), Acute Bronchitis (J20.8), Lower Respiratory Infection (J22, J98.8) and Acute Respiratory Distress Syndrome (J80). Following two ICD-10-CM Official Coding and Reporting Guidelines released by CDC before and at/after April 1, 2020, we used diagnosis code aggregations to define a COVID-19 related diagnosis. An illness due to COVID-19 was specified if one of the ICD-10-CM codes (J12.89, J20.8, J22, J98.8, J80) was recorded in combination with either B97.29 (before April 1, 2020), or in combination with U07.1 (on/after April 1, 2020). These joint diagnosis codes needed to occur during the same hospitalization encounter, with a look-back period of 21 days prior to hospitalization. We applied the same logic for mapped SNOMED Concepts (261326, 260139, 4307774, 256451, 4195694, 320136, 4100065, 37311061). More ICD codes are detailed in Table S2. Pre-coordinated diagnoses codes (SNOMED, OMOP Extension) are shown in Table S3, followed by excluded codes in Tables S4 and S5. Refinement of phenotypes was guided by chart review.

Use cases of concept set are shown in Fig. S3B. As the Responding Sites' OMOP databases are not accessible to the Lead Site, a query developed at the Lead Site might miss a concept used in other sites. In such case, the database analyst at the Responding Site notifies the Lead Site by creating a GitHub issue, with zero or unexpectedly low count or proportion in the results generated by the initial template query authored by the Lead Site. For example, in Fig. S1B, during the Concept Set development for the quantitative laboratory measurement D-dimer, the responding site notified the Lead site about using another concept for D-dimer (Concept ID: 3048540 instead of Concept ID: 3051714), returning values with a different measurement unit than the ones of the Lead site (n/L instead of mg/L). Therefore, the Lead site had to add the missing concept to Concept Set and implemented logic to cover a measurement unit transformation. In the case of the Concept Set development for blood type, a responding site was missing concepts for blood type in its local OMOP CDM database. An ETL script was implemented to map EHR data to OMOP CDM. Sources of discrepancy were diverse; examples included unit differences in measurement values, differently mapped concepts, and non-compliance to the coding guideline.

## GLORE

In addition to count queries, we also applied Grid Binary LOGistic REgression (GLORE) (10) to compute the effect of the exposure variable on the outcome, adjusted for confounders, without sharing patient-level data, as this would increase the risk for a privacy breach. We rewrote the

Newton-Raphson (NR) method to find the maximizer of the likelihood function of the parameters in logistic regression. Since the first and the second derivatives of the log likelihood functions are separable (i.e., they can be partially calculated at each site), in each NR iteration, each client institute calculated a  $(p+1)$  dimensional vector of parameters, where  $p$  is the number of features in the model such as *age*, *gender*, and *race* and a  $(p+1)$  by  $(p+1)$  variance-covariance matrix, and sent JSON files containing these two objects to the Consortium Hub. Fig. S5 shows the screen shot of the real example JSON file used the GLORE run to answer the in-hospital mortality question. No patient level information was shared or transferred between institutions. At each iteration, the Consortium Hub automatically updated the global coefficient vector and the variance-covariance matrix and sent them back to clients. All clients repeatedly sent the updated JSON file to the Consortium Hub, until the estimates stabilized or reached a pre-defined number of iterations. To enhance the security, the Consortium Hub server allowed (i.e., “whitelisted”) only the pre-registered IP addresses of client machines and opened the port only during the scheduled time window.

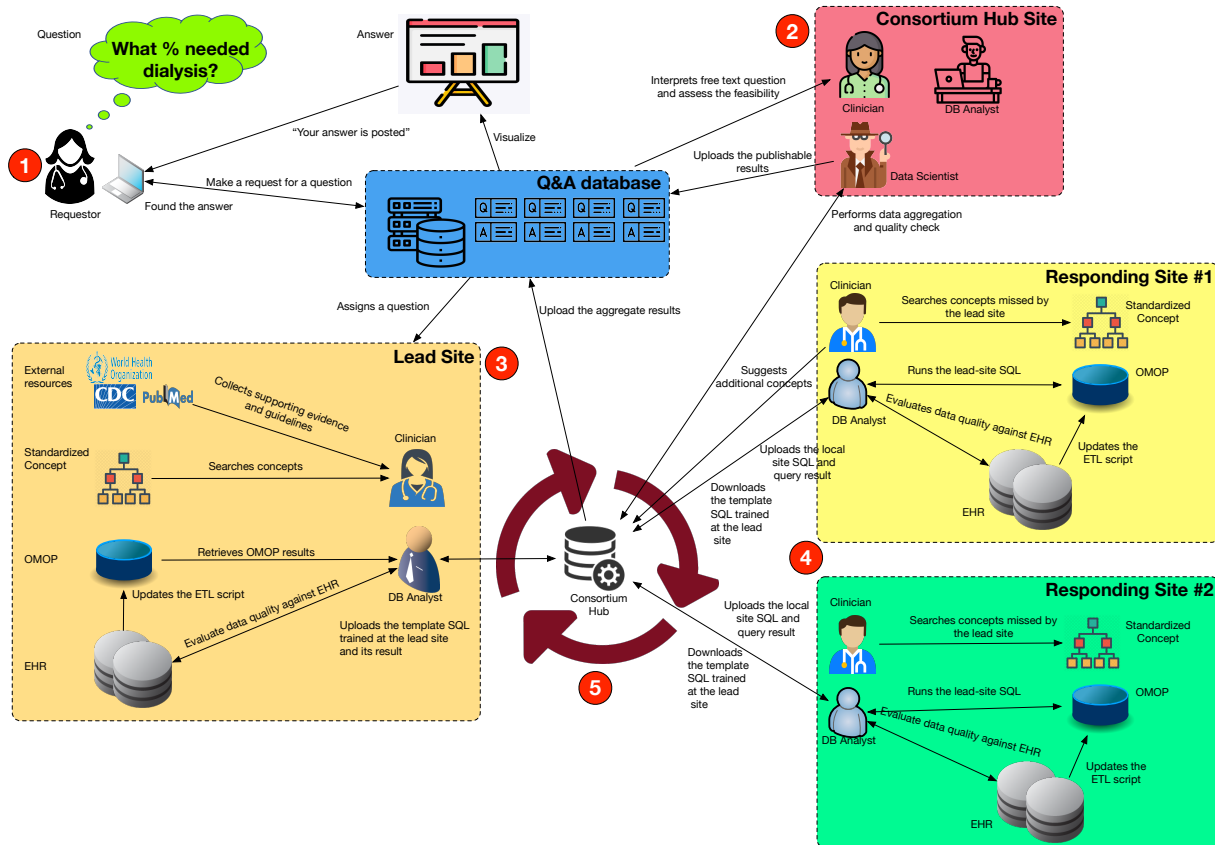

**Fig S1. What happens behind the scenes: From questions to answers.** Our Consortium involves humans in the clinical interpretation of questions and data quality control. The responsibility for formulating the code for a question is delegated to a different Lead Site for each question. Step 1. Users access a public web portal and search/browse if there is an answer posted or a pending response to their question. If not, they propose a question. Step 2. The questions get triaged to a Consortium Hub Clinical Informatician who determines whether (a) the answer will be of general interest and (b) how the question needs to be revised so that it can be answered by most sites. If these criteria are met, the Consortium Hub Clinical Informatician assigns the question to a Clinical Informatician at the site that will serve as the Lead Site, delegating the question and end-to-end process of query and response development. Step 3. The Lead site Clinical Informatician works together with the Lead Site Data Analyst to create concept sets, design a query, and check local results. Some iterations may happen before the Lead Site Clinical Informatician approves the query and submits to the Consortium Hub, where it is distributed to the Responding Sites. Step 4. The Responding Site Clinical Informatician and the Responding Site Data Analyst adjust the concept set, inclusion logic, and database query code in structured query language (SQL) for local implementation, obtain and quality controls the site-level results, and submit results to the Consortium Hub. For distributed multivariate analytics, a table is kept locally to be processed by the client software that transfers the aggregate results to the server software running at the Hub. Iterative algorithms are run in agreed-upon synchronous sessions using a server that is operational only during the analytics run and a firewall that allows only white-listed internet protocol (IP) addresses. Step 5. Site-level results are aggregated at the Hub and submitted to the Analytics Lead, who checks for

discrepancies across sites. If an error is detected, the local site is informed to fix it. Once there are no discrepancies, the Lead Site Analyst generates the visualizations and submits to the Consortium Hub Clinical Informatician for approval and posting on the portal.

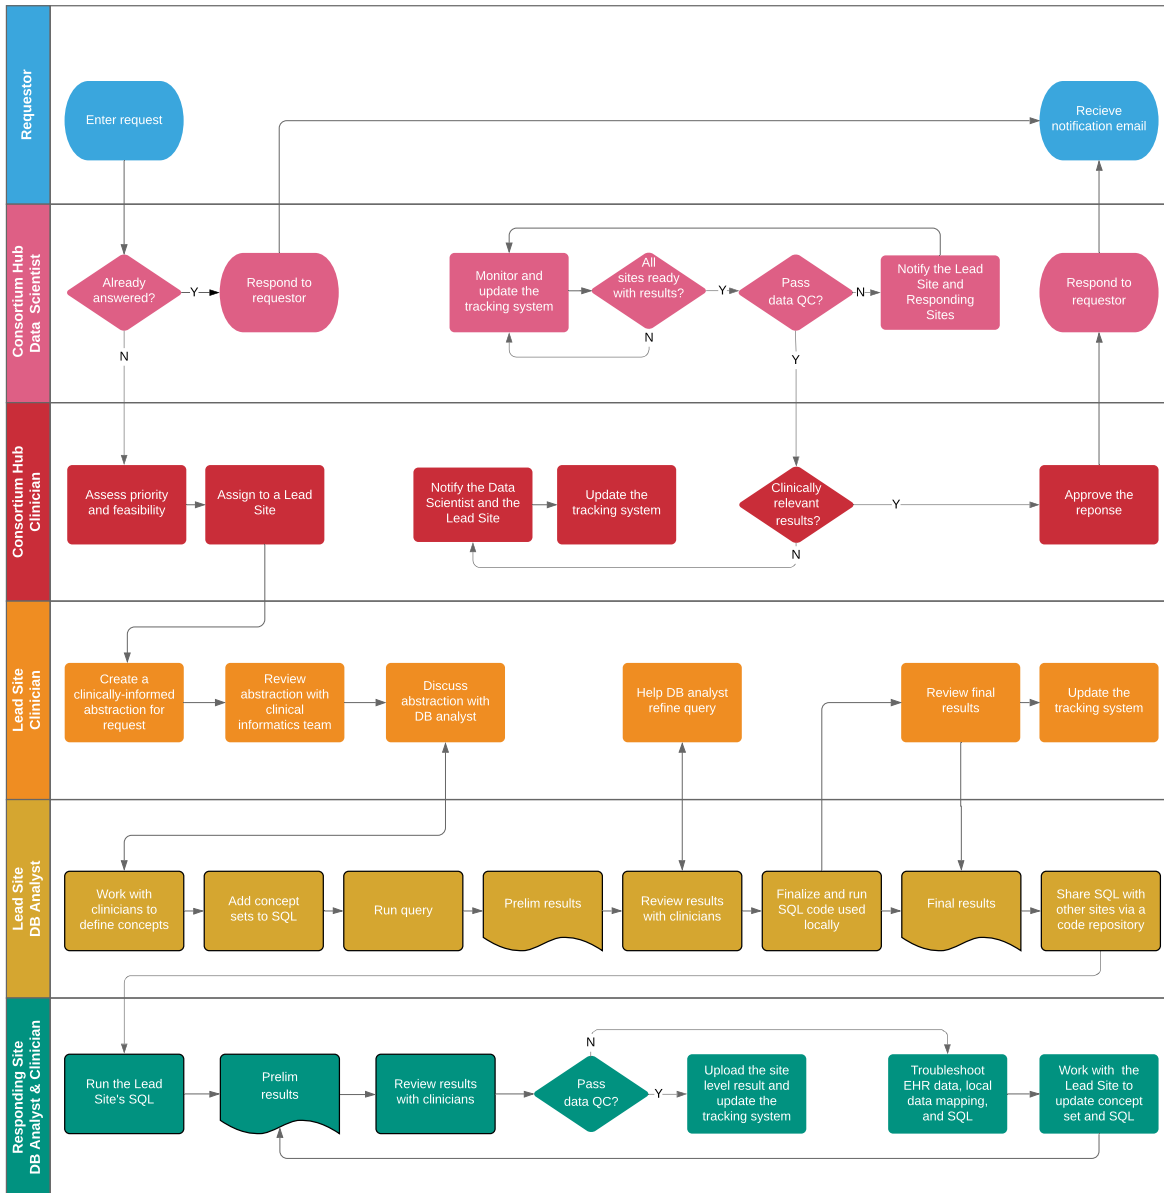

**Fig. S2. Swimlane diagram.** A Q&A process flow starts from a user entering a request and ends with the user receiving email notification about a response. Both clinicians and database analysts work together to answer the user’s question.



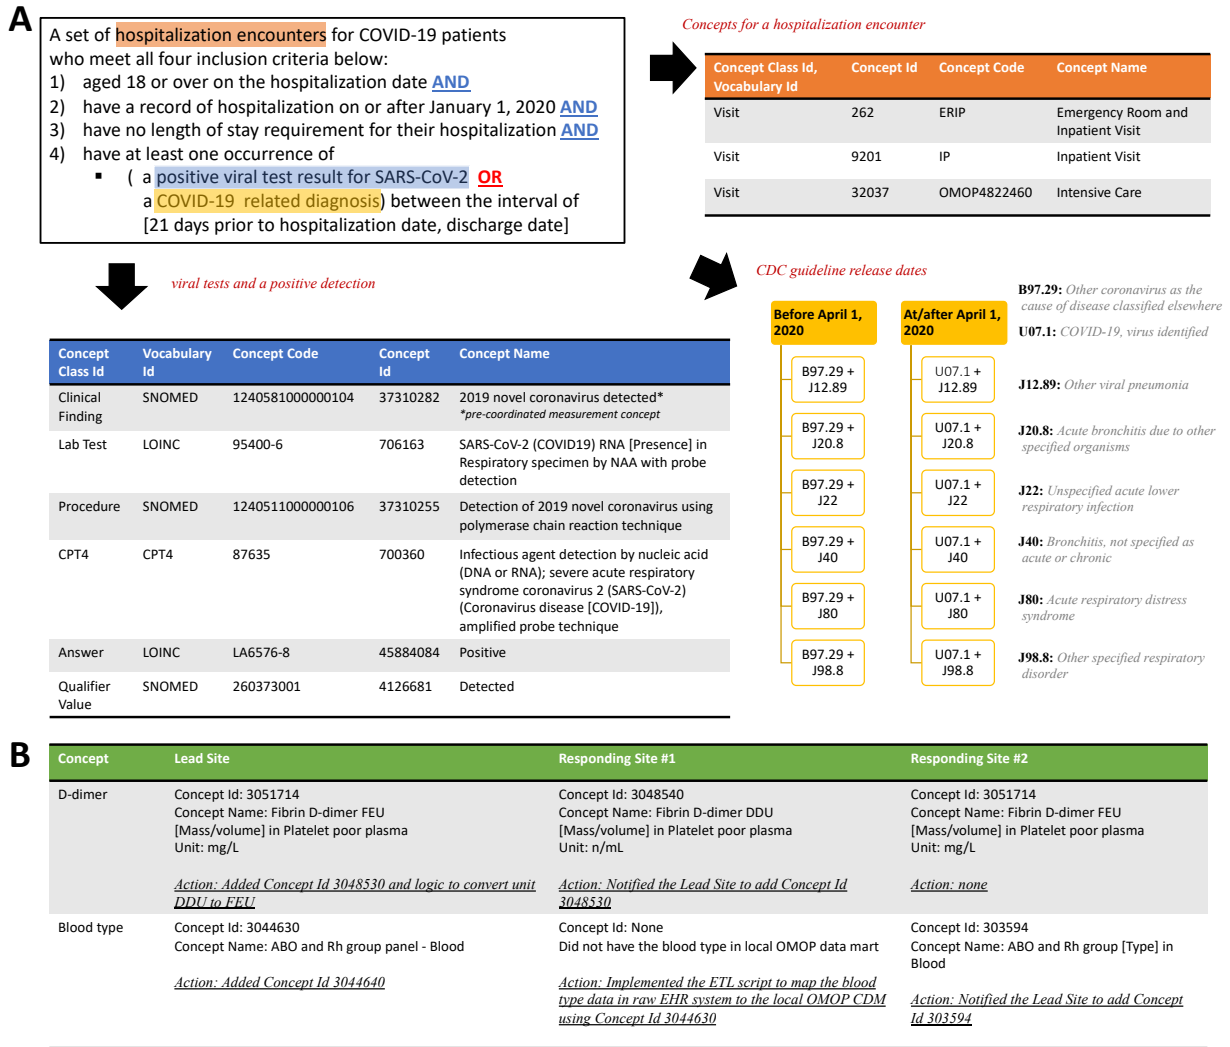

**Fig. S3. Cohort definition and Concept set development.** Defining a cohort of patients that is frequently used to answer questions helps us reuse code. In this example, defining the cohort of patients hospitalized with COVID-19 involves use of SARS-CoV-2 test results or diagnosis codes (A). In (B), we illustrate how a laboratory test is defined differently at two sites, and how blood type had yet to be harmonized into OMOP at one site.

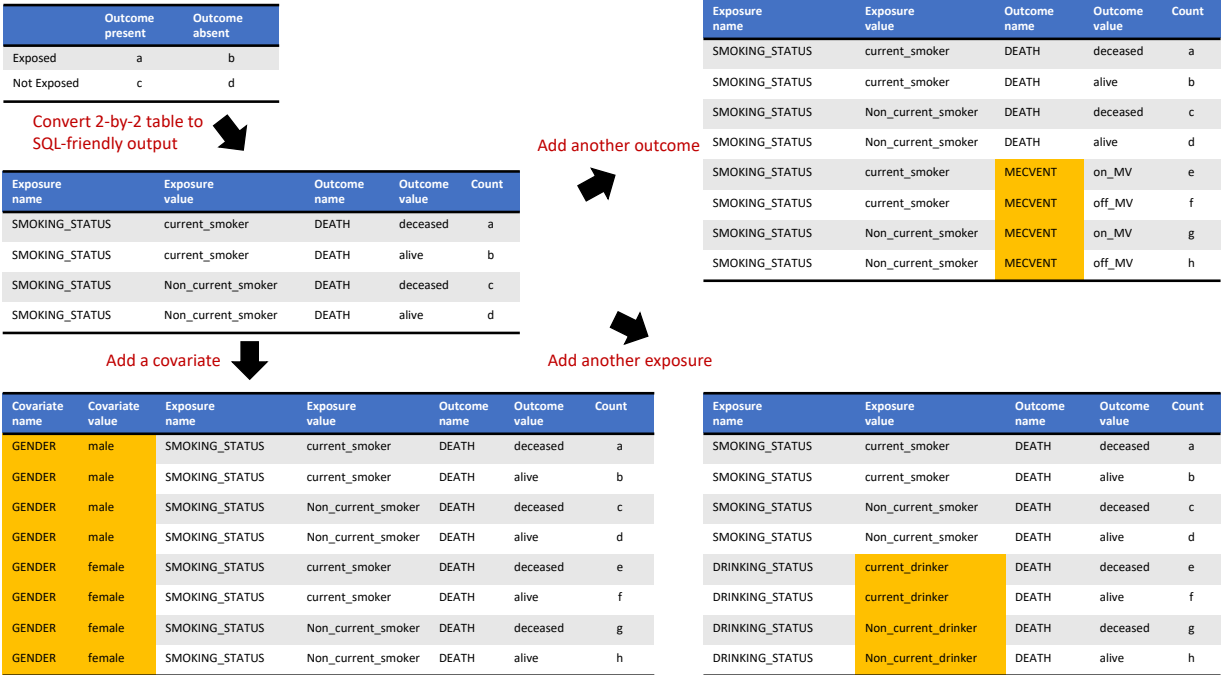

**Fig. S4. Extensible output format of site level results.** A 2-by-2 table is converted to SQL-friendly 4-row format to store the binary exposure and the binary outcome question. Then it expands to add a covariate, second outcome, or another exposure. A name-value format was adopted for a clarity and efficiency for data quality check and aggregation.

```

{
  "SD_matrix": "[0.5077726510299974, 0.6324728142599232, 0.18220658774632076, 0.37292021986559626, 0.43743776771472637, 0.1960131777242006, 0.19834144545189025]",
  "Beta 1": "[-6.571584585029573, 4.898163226230124, 0.28996329717199837, 0.11797777998361085, -0.7386399038721124, 0.6327913437876899, 0.12963251924656277]",
  "Covariance matrix": [
    "[0.2578330651340315, -0.29910112576665693, -0.030721970027503372, -0.02629726036935407, -0.027684288243071647, -0.02612168473239688, -0.03248897336604138]",
    "[-0.29910112576665693, 0.4000218607778673, 0.011436929894340265, 0.006584197762780007, 0.006928118984794617, 0.01878901528913741, 0.026788335914024304]",
    "[-0.030721970027503383, 0.011436929894340272, 0.03319924061815768, 0.00343311678189749, 0.005303086831563236, 6.284006568122062E-4, 0.002145829717076881]",
    "[-0.026297260369354033, 0.006584197762779952, 0.0034331167818974825, 0.13906949038460464, 0.01962845021821445, 0.012384909942492117, 0.011932499137359035]",
    "[-0.027684288243071616, 0.006928118984794577, 0.0053030868315632335, 0.019628450218214452, 0.19135180062324292, 0.012535724405576027, 0.01162818126021859]",
    "[-0.026121684732396865, 0.01878901528913739, 6.284006568122079E-4, 0.012384909942492119, 0.01253572440557602, 0.03842116584153905, -0.010711730049463304]",
    "[-0.03248897336604139, 0.026788335914024314, 0.0021458297170768715, 0.011932499137359038, 0.011628181260218596, -0.010711730049463295, 0.03933932898394516]"
  ]
}

```

**Fig. S5. Transferred file in the federated logistic regression.** A real example of a transferred file in JSON format among the Consortium Hub and participating sites is shown to illustrate how patient level data are protected. The first row is a vector of standard deviations of the coefficients of the global logistic regression. The second row is a vector of coefficients. The third row is a covariance matrix between features. At each iteration of the federated logistic regression, this JSON file is being transferred among sites until convergence or the process reaches the predetermined number of iterations. The values in JSON file above are used in the forest plot in Fig. 2.

**Table S1. Data quality checks and issues.** Different data quality check types are enumerated together with real issues identified with this COVID-19 project.

| <b>Check Type</b>                   | <b>Example of data quality issue</b>                                                                                                            |
|-------------------------------------|-------------------------------------------------------------------------------------------------------------------------------------------------|
| Datetime reversal                   | A condition/observation was recorded after discharge date                                                                                       |
| Extreme outlier                     | The hospital length of stay was greater than 80 days. The median length of stay ranged between 11 and 15 days in China and US studies           |
| Gaps in data transformation         | Discharge disposition and ICU departments were not transformed to OMOP                                                                          |
| Loss of granularity during mapping  | Invasive and non-invasive mechanical ventilation mapped to the same concept                                                                     |
| Impossible events                   | Multiple death events occurred in different time points from multiple hospital encounters                                                       |
| Non-compliance to the output format | Header was missing in the predefined output .csv format, missing columns, shifted columns, and duplicate rows                                   |
| Unexpected proportion               | The percentage of current smokers was 65% at a certain site. The national percentage of smoking was 15.6% among male adults in 2018 US CDC data |
| Unexpected zero count               | The number of patients who were taking any anti-hypertensives was zero                                                                          |
| Unmatched group sum                 | The total sums of patient count in age groups and race groups were different even when all cell counts were greater than 10                     |
| Version mismatch                    | The version of the template query was revised after the query result was uploaded                                                               |

**Table S2. Concept Relationships between ICD10CM and SNOMED Concepts.** ICD10CM Concepts and their mapped SNOMED Concepts from the CONDITION\_OCCURRENCE table. In OMOP CDM, ICD10CM Concepts are non-Standard Concepts. Therefore, ICD10CM Concepts are mapped to SNOMED-based Standard Concepts (9). These relationships are stored in the OMOP CDM CONCEPT\_RELATIONSHIP table. In this case each ICD10CM Concept got the relationship\_id = 'Maps to', which directs to one SNOMED Concept.

| Concept Code 1 (ICD10CM) | Concept Name 1                                                                             | Concept Id 1 | Relationship Id | Concept Id 2 | Concept Name 2                          | Concept Code 2 (SNOMED) |
|--------------------------|--------------------------------------------------------------------------------------------|--------------|-----------------|--------------|-----------------------------------------|-------------------------|
| J12.89                   | Other viral pneumonia                                                                      | 45572161     | 'Maps to'       | 261326       | Viral pneumonia                         | 75570004                |
| J20.8                    | Acute bronchitis due to other specified organisms                                          | 35207965     | 'Maps to'       | 260139       | Acute bronchitis                        | 10509002                |
| J22                      | Unspecified acute lower respiratory infection                                              | 35207970     | 'Maps to'       | 4307774      | Acute lower respiratory tract infection | 195742007               |
| J40                      | Bronchitis, not specified as acute or chronic                                              | 35208013     | 'Maps to'       | 256451       | Bronchitis                              | 32398004                |
| J80                      | Acute respiratory distress syndrome                                                        | 35208069     | 'Maps to'       | 4195694      | Acute respiratory distress syndrome     | 67782005                |
| J98.8                    | Other specified respiratory disorders                                                      | 35208108     | 'Maps to'       | 320136       | Disorder of respiratory system          | 50043002                |
| B97.29                   | Other coronavirus as the cause of diseases classified elsewhere                            | 45600471     | 'Maps to'       | 4100065      | Disease due to Coronaviridae            | 27619001                |
| U07.1                    | Emergency use of U07.1   Disease caused by severe acute respiratory syndrome coronavirus 2 | 702953       | 'Maps to'       | 37311061     | Disease caused by 2019-nCoV             | 840539006               |

**Table S3. Pre-coordinated diagnosis codes.** Diagnosis codes (OMOP Extension, SNOMED) used to identify patients with COVID-19. At least one occurrence of the diagnosis codes during a hospital encounter with a look back period of 21 days prior to hospitalization captured the patient having a COVID-19 related diagnosis. In contrast to the joint diagnosis codes (ICD-10-CM, SNOMED) mentioned in Fig 3A and Table S3, there was no further applied logic.

| Concept Class Id | Vocabulary Id  | Concept Code     | Concept Id | Concept Name                                                          |
|------------------|----------------|------------------|------------|-----------------------------------------------------------------------|
| Clinical Finding | OMOP Extension | OMOP4873906      | 756023     | Acute bronchitis due to COVID-19                                      |
| Clinical Finding | OMOP Extension | OMOP4873911      | 756044     | Acute respiratory distress syndrome (ARDS) due to COVID-19            |
| Clinical Finding | OMOP Extension | OMOP4873910      | 756061     | Asymptomatic COVID-19                                                 |
| Clinical Finding | OMOP Extension | OMOP4873909      | 756031     | Bronchitis due to COVID-19                                            |
| Clinical Finding | SNOMED         | 1240561000000108 | 37310284   | Encephalopathy caused by 2019 novel coronavirus                       |
| Clinical Finding | SNOMED         | 1240571000000101 | 37310283   | Gastroenteritis caused by 2019 novel coronavirus                      |
| Clinical Finding | OMOP Extension | OMOP4873908      | 756081     | Infection of lower respiratory tract due to COVID-19                  |
| Clinical Finding | SNOMED         | 1240541000000107 | 37310286   | Infection of upper respiratory tract caused by 2019 novel coronavirus |
| Clinical Finding | SNOMED         | 1240531000000103 | 37310287   | Myocarditis caused by 2019 novel coronavirus                          |
| Clinical Finding | SNOMED         | 1240521000000100 | 37310254   | Otitis media caused by 2019 novel coronavirus                         |
| Clinical Finding | SNOMED         | 1240551000000105 | 37310285   | Pneumonia caused by 2019 novel coronavirus                            |
| Clinical Finding | OMOP Extension | OMOP4873907      | 756039     | Respiratory infection due to COVID-19                                 |

**Table S4. Excluded diagnosis codes.** These ICD-10-CM Codes, mentioned in CDC guideline (29), were excluded given the high count of false positive COVID-19 patients.

| <b>ICD-10-CM Code</b> | <b>Description</b>                                                         |
|-----------------------|----------------------------------------------------------------------------|
| R05                   | Cough                                                                      |
| R06.02                | Shortness of breath                                                        |
| R50.9                 | Fever, unspecified                                                         |
| Z20.828               | Contact with and (suspected) exposure to other viral communicable diseases |

**Table S5. Other excluded diagnosis codes.** These ICD10CM and SNOMED Concepts were mentioned in N3C - COVID-19 Phenotype Documentation, Version 1.6 (Last updated 6/5/2020) but excluded from our study, as the count of false positives COVID-19 patients was too high.

| Concept Class Id | Vocabulary Id | Concept Code | Concept Id | Concept Name                                                                           |
|------------------|---------------|--------------|------------|----------------------------------------------------------------------------------------|
| Condition        | ICD10CM       | J96.2        | 35208101   | Acute and chronic respiratory failure                                                  |
| Condition        | ICD10CM       | J96.22       | 45581868   | Acute and chronic respiratory failure with hypercapnia                                 |
| Condition        | ICD10CM       | J96.21       | 45543283   | Acute and chronic respiratory failure with hypoxia                                     |
| Condition        | ICD10CM       | J96.20       | 45596290   | Acute and chronic respiratory failure, unspecified whether with hypoxia or hypercapnia |
| Condition        | ICD10CM       | J21          | 1569471    | Acute bronchiolitis                                                                    |
| Condition        | ICD10CM       | J21.1        | 920135     | Acute bronchiolitis due to human metapneumovirus                                       |
| Condition        | ICD10CM       | J21.8        | 35207968   | Acute bronchiolitis due to other specified organisms                                   |
| Condition        | ICD10CM       | J21.0        | 35207967   | Acute bronchiolitis due to respiratory syncytial virus                                 |
| Condition        | ICD10CM       | J21.9        | 35207969   | Acute bronchiolitis, unspecified                                                       |
| Condition        | ICD10CM       | J20          | 1569470    | Acute bronchitis                                                                       |
| Condition        | ICD10CM       | J20.3        | 35207960   | Acute bronchitis due to coxsackievirus                                                 |
| Condition        | ICD10CM       | J20.7        | 35207964   | Acute bronchitis due to echovirus                                                      |
| Condition        | ICD10CM       | J20.1        | 35207958   | Acute bronchitis due to Hemophilus influenzae                                          |
| Condition        | ICD10CM       | J20.0        | 35207957   | Acute bronchitis due to Mycoplasma pneumoniae                                          |
| Condition        | ICD10CM       | J20.8        | 35207965   | Acute bronchitis due to other specified organisms                                      |
| Condition        | ICD10CM       | J20.4        | 35207961   | Acute bronchitis due to parainfluenza virus                                            |
| Condition        | ICD10CM       | J20.5        | 35207962   | Acute bronchitis due to respiratory syncytial virus                                    |
| Condition        | ICD10CM       | J20.6        | 35207963   | Acute bronchitis due to rhinovirus                                                     |
| Condition        | ICD10CM       | J20.2        | 35207959   | Acute bronchitis due to streptococcus                                                  |
| Condition        | ICD10CM       | J20.9        | 35207966   | Acute bronchitis, unspecified                                                          |
| Condition        | ICD10CM       | R06.03       | 1326788    | Acute respiratory distress                                                             |
| Condition        | ICD10CM       | J80          | 35208069   | Acute respiratory distress syndrome                                                    |
| Condition        | ICD10CM       | J96.0        | 35208099   | Acute respiratory failure                                                              |
| Condition        | ICD10CM       | J96.02       | 45596289   | Acute respiratory failure with hypercapnia                                             |
| Condition        | ICD10CM       | J96.01       | 45567283   | Acute respiratory failure with hypoxia                                                 |
| Condition        | ICD10CM       | J96.00       | 45605906   | Acute respiratory failure, unspecified whether with hypoxia or hypercapnia             |
| Condition        | ICD10CM       | J06.9        | 35207929   | Acute upper respiratory infection, unspecified                                         |
| Condition        | ICD10CM       | J12.0        | 35207932   | Adenoviral pneumonia                                                                   |
| Condition        | ICD10CM       | R43.0        | 35211351   | Anosmia                                                                                |
| Condition        | ICD10CM       | J40          | 35208013   | Bronchitis, not specified as acute or chronic                                          |



|             |         |         |          |                                                                                   |
|-------------|---------|---------|----------|-----------------------------------------------------------------------------------|
| Condition   | ICD10CM | J18.0   | 35207952 | Bronchopneumonia, unspecified organism                                            |
| Condition   | ICD10CM | R07.1   | 35211284 | Chest pain on breathing                                                           |
| Condition   | ICD10CM | R68.83  | 45577807 | Chills (without fever)                                                            |
| Condition   | ICD10CM | J96.1   | 35208100 | Chronic respiratory failure                                                       |
| Condition   | ICD10CM | J96.12  | 45572177 | Chronic respiratory failure with hypercapnia                                      |
| Condition   | ICD10CM | J96.11  | 45538489 | Chronic respiratory failure with hypoxia                                          |
| Condition   | ICD10CM | J96.10  | 45548131 | Chronic respiratory failure, unspecified whether with hypoxia or hypercapnia      |
| Observation | ICD10CM | Z20.828 | 45542411 | Contact with and (suspected) exposure to other viral communicable diseases        |
| Condition   | ICD10CM | B34.2   | 35205800 | Coronavirus infection, unspecified                                                |
| Condition   | ICD10CM | R05     | 35211275 | Cough                                                                             |
| Condition   | ICD10CM | R50.2   | 35211385 | Drug induced fever                                                                |
| Condition   | ICD10CM | R06.0   | 1572191  | Dyspnea                                                                           |
| Condition   | ICD10CM | R06.00  | 45587496 | Dyspnea, unspecified                                                              |
| Condition   | ICD10CM | R50.84  | 45597190 | Febrile nonhemolytic transfusion reaction                                         |
| Condition   | ICD10CM | R50     | 1572254  | Fever of other and unknown origin                                                 |
| Condition   | ICD10CM | R50.81  | 45606818 | Fever presenting with conditions classified elsewhere                             |
| Condition   | ICD10CM | R50.9   | 35211387 | Fever, unspecified                                                                |
| Condition   | ICD10CM | J12.3   | 35207935 | Human metapneumovirus pneumonia                                                   |
| Condition   | ICD10CM | J18.2   | 35207954 | Hypostatic pneumonia, unspecified organism                                        |
| Condition   | ICD10CM | J18.1   | 35207953 | Lobar pneumonia, unspecified organism                                             |
| Condition   | ICD10CM | R06.01  | 45597165 | Orthopnea                                                                         |
| Condition   | ICD10CM | R06.09  | 45548944 | Other forms of dyspnea                                                            |
| Condition   | ICD10CM | J18.8   | 35207955 | Other pneumonia, unspecified organism                                             |
| Condition   | ICD10CM | R50.8   | 35211386 | Other specified fever                                                             |
| Condition   | ICD10CM | J98.8   | 35208108 | Other specified respiratory disorders                                             |
| Condition   | ICD10CM | J12.8   | 35207936 | Other viral pneumonia                                                             |
| Condition   | ICD10CM | R43.2   | 35211353 | Parageusia                                                                        |
| Condition   | ICD10CM | J12.2   | 35207934 | Parainfluenza virus pneumonia                                                     |
| Condition   | ICD10CM | J12.81  | 45567260 | Pneumonia due to SARS-associated coronavirus                                      |
| Condition   | ICD10CM | J18.9   | 35207956 | Pneumonia, unspecified organism                                                   |
| Condition   | ICD10CM | J18     | 1569469  | Pneumonia, unspecified organism                                                   |
| Condition   | ICD10CM | R50.82  | 45597189 | Postprocedural fever                                                              |
| Condition   | ICD10CM | R50.83  | 45592424 | Postvaccination fever                                                             |
| Condition   | ICD10CM | J96     | 1569515  | Respiratory failure, not elsewhere classified                                     |
| Condition   | ICD10CM | J96.9   | 35208102 | Respiratory failure, unspecified                                                  |
| Condition   | ICD10CM | J96.92  | 45533563 | Respiratory failure, unspecified with hypercapnia                                 |
| Condition   | ICD10CM | J96.91  | 45605907 | Respiratory failure, unspecified with hypoxia                                     |
| Condition   | ICD10CM | J96.90  | 45567284 | Respiratory failure, unspecified, unspecified whether with hypoxia or hypercapnia |

|             |         |           |          |                                           |
|-------------|---------|-----------|----------|-------------------------------------------|
| Condition   | ICD10CM | J12.1     | 35207933 | Respiratory syncytial virus pneumonia     |
| Condition   | ICD10CM | R06.02    | 45534422 | Shortness of breath                       |
| Condition   | ICD10CM | J12       | 1569465  | Viral pneumonia, not elsewhere classified |
| Condition   | ICD10CM | J12.9     | 35207937 | Viral pneumonia, unspecified              |
| Condition   | SNOMED  | 75483001  | 442555   | Breathing painful                         |
| Condition   | SNOMED  | 161940008 | 4059022  | Breathless - mild exertion                |
| Condition   | SNOMED  | 161939006 | 4059021  | Breathless - moderate exertion            |
| Condition   | SNOMED  | 161855003 | 4059003  | C/O shivering                             |
| Condition   | SNOMED  | 274664007 | 4168213  | Chest pain on breathing                   |
| Condition   | SNOMED  | 43724002  | 434490   | Chill                                     |
| Condition   | SNOMED  | 49727002  | 254761   | Cough                                     |
| Condition   | SNOMED  | 135883003 | 4048098  | Cough with fever                          |
| Condition   | SNOMED  | 11833005  | 4038519  | Dry cough                                 |
| Condition   | SNOMED  | 267036007 | 312437   | Dyspnea                                   |
| Condition   | SNOMED  | 161941007 | 4060052  | Dyspnea at rest                           |
| Condition   | SNOMED  | 60845006  | 4263848  | Dyspnea on exertion                       |
| Observation | SNOMED  | 840546002 | 37311059 | Exposure to 2019 novel coronavirus        |
| Condition   | SNOMED  | 103001002 | 4011766  | Feeling feverish                          |
| Condition   | SNOMED  | 386661006 | 437663   | Fever                                     |
| Measurement | SNOMED  | 426000000 | 4141062  | Fever greater than 100.4 Fahrenheit       |
| Condition   | SNOMED  | 274640006 | 4164645  | Fever with chills                         |
| Condition   | SNOMED  | 23141003  | 4047610  | Gaspings for breath                       |
| Condition   | SNOMED  | 409702008 | 4260205  | Hyperpyrexia                              |
| Condition   | SNOMED  | 44169009  | 4185711  | Loss of sense of smell                    |
| Condition   | SNOMED  | 36955009  | 4289517  | Loss of taste                             |
| Condition   | SNOMED  | 426976009 | 4140453  | Pain provoked by breathing                |
| Condition   | SNOMED  | 247410004 | 4090569  | Painful cough                             |
| Condition   | SNOMED  | 284523002 | 4109381  | Persistent cough                          |
| Condition   | SNOMED  | 2237002   | 4330445  | Pleuritic pain                            |
| Condition   | SNOMED  | 28743005  | 4102774  | Productive cough                          |

| <b>R2D2 Consortium Members</b> |                   |                    |                                                                                                                                                                                                                                                                    |
|--------------------------------|-------------------|--------------------|--------------------------------------------------------------------------------------------------------------------------------------------------------------------------------------------------------------------------------------------------------------------|
| <b>Last Name</b>               | <b>First Name</b> | <b>Middle Name</b> | <b>Affiliation(s)</b>                                                                                                                                                                                                                                              |
| Anderson                       | David             | M                  | San Mateo County Health, Health Information Technology, San Mateo, CA, USA                                                                                                                                                                                         |
| Aratow                         | Michael           |                    | San Mateo Medical Center, San Mateo, CA, USA                                                                                                                                                                                                                       |
| Balacha                        | Chandrasekar      |                    | University of Southern California, Viterbi School of Engineering, University of Southern California, Los Angeles, CA, USA                                                                                                                                          |
| Bath                           | Tyler             |                    | UC San Diego Health Department of Biomedical Informatics, University of California, San Diego, La Jolla, CA, USA                                                                                                                                                   |
| Baxter                         | Sally             | L                  | UC San Diego Health Department of Biomedical Informatics, University of California, San Diego, La Jolla, CA, USA;<br>UCSD Viterbi Family Department of Ophthalmology and Shiley Eye Institute, University of California, San Diego, La Jolla, CA, USA              |
| Becker-Pennrich                | Andrea            |                    | LMU Klinikum, Department of Anaesthesiology, Ludwig Maximilian University of Munich, Munich, Bavaria, Germany                                                                                                                                                      |
| Bell                           | Douglas           | S                  | Biomedical Informatics Program, UCLA Clinical and Translational Science Institute (CTSI), Los Angeles, CA, USA                                                                                                                                                     |
| Bernstam                       | Elmer             | V                  | School of Biomedical Informatics, The University of Texas Health Science Center at Houston, Houston, TX, USA                                                                                                                                                       |
| Carter                         | William           | A                  | Data Science to Patient Value Program, University of Colorado Anschutz Medical Campus, Aurora, CO, USA                                                                                                                                                             |
| Ngan                           | Chau              |                    | Biomedical Informatics Program, UCLA Clinical and Translational Science Institute (CTSI), Los Angeles, CA, USA                                                                                                                                                     |
| Day                            | Michele           | E                  | UC San Diego Health Department of Biomedical Informatics, University of California, San Diego, La Jolla, CA, USA                                                                                                                                                   |
| Doctor                         | Jason             | N                  | USC Schaeffer Center for Health Policy and Economics, Price School of Policy, University of Southern California, Los Angeles, CA, USA                                                                                                                              |
| DuVall                         | Scott             |                    | Salt Lake City VA, Salt Lake City, UT, USA;<br>Division of Epidemiology, University of Utah, Salt Lake City, UT, USA                                                                                                                                               |
| El-Kareh                       | Robert            |                    | UC San Diego Health Department of Biomedical Informatics, University of California, San Diego, La Jolla, CA, USA                                                                                                                                                   |
| Florian                        | Renato            |                    | Departments of General Internal Medicine and Enterprise Information Services, Cedars Sinai Medical Center, Los Angeles, CA, USA                                                                                                                                    |
| Follett                        | Robert            | W                  | Biomedical Informatics Program, UCLA Clinical and Translational Science Institute (CTSI), Los Angeles, CA, USA                                                                                                                                                     |
| Geisler                        | Benjamin          | P                  | Institute for Medical Information Processing, Biometry, and Epidemiology (IBE), Ludwig Maximilian University of Munich, Munich, Bavaria, Germany                                                                                                                   |
| Ghigi                          | Alessandro        |                    | Institute for Clinical and Translational Science, University of California, Irvine, Irvine, CA, USA                                                                                                                                                                |
| Gottlieb                       | Assaf             |                    | School of Biomedical Informatics, The University of Texas Health Science Center at Houston, Houston, TX, USA                                                                                                                                                       |
| Hinske                         | Ludwig            | C                  | Institute for Medical Information Processing, Biometry, and Epidemiology (IBE), Ludwig Maximilian University of Munich, Munich, Bavaria, Germany;<br>LMU Klinikum, Department of Anaesthesiology, Ludwig Maximilian University of Munich, Munich, Bavaria, Germany |
| Hu                             | Zhaoxian          |                    | Institute for Clinical and Translational Science, University of California, Irvine, Irvine, CA, USA                                                                                                                                                                |
| Ir                             | Diana             |                    | Data Science to Patient Value Program, University of Colorado Anschutz Medical Campus, Aurora, CO, USA                                                                                                                                                             |
| Jiang                          | Xiaoqian          |                    | School of Biomedical Informatics, The University of Texas Health Science Center at Houston, Houston, TX, USA                                                                                                                                                       |
| Kim                            | Katherine         | K                  | Betty Irene Moore School of Nursing, University of California, Davis, Sacramento, CA, USA;<br>School of Medicine, Department of Public Health Sciences, Health Informatics Division, University of California Davis, Sacramento, CA, USA                           |
| Kim                            | Jihoon            |                    | UC San Diego Health Department of Biomedical Informatics, University of California, San Diego, La Jolla, CA, USA                                                                                                                                                   |

| Last Name    | First Name | Middle Name | Affiliation(s)                                                                                                                                                                                                                                                        |
|--------------|------------|-------------|-----------------------------------------------------------------------------------------------------------------------------------------------------------------------------------------------------------------------------------------------------------------------|
| Knight       | Tara       | K           | USC Schaeffer Center for Health Policy and Economics, Price School of Policy, University of Southern California, Los Angeles, CA, USA                                                                                                                                 |
| Koola        | Jejo       | D           | UC San Diego Health Department of Biomedical Informatics, University of California, San Diego, La Jolla, CA, USA                                                                                                                                                      |
| Kuo          | Tsung-Ting |             | UC San Diego Health Department of Biomedical Informatics, University of California, San Diego, La Jolla, CA, USA                                                                                                                                                      |
| Lee          | Nelson     |             | Academic Research Systems, University of California, San Francisco, San Francisco, CA, USA                                                                                                                                                                            |
| Mansmann     | Ulrich     |             | Institute for Medical Information Processing, Biometry, and Epidemiology (IBE), Ludwig Maximilian University of Munich, Munich, Bavaria, Germany                                                                                                                      |
| Matheny      | Michael    | E           | GRECC, Tennessee Valley Healthcare System, Nashville, TN, USA;<br>Department of Biomedical Informatics, Biostatistics, and Medicine, Vanderbilt University Medical Center, Nashville, TN, USA                                                                         |
| Meeker       | Daniella   |             | Department of Preventive Medicine, Keck School of Medicine, Los Angeles, CA, USA;<br>USC Schaeffer Center for Health Policy and Economics, Price School of Policy, University of Southern California, Los Angeles, CA, USA                                            |
| Mou          | Zongyang   |             | UC San Diego Health Department of Biomedical Informatics, University of California, San Diego, La Jolla, CA, USA;<br>Department of Surgery, UC San Diego School of Medicine, San Diego, CA, USA                                                                       |
| Murphy       | Robert     | E           | School of Biomedical Informatics, The University of Texas Health Science Center at Houston, Houston, TX, USA                                                                                                                                                          |
| Neumann      | Larissa    |             | UC San Diego Health Department of Biomedical Informatics, University of California, San Diego, La Jolla, CA, USA;<br>Institute for Medical Information Processing, Biometry, and Epidemiology (IBE), Ludwig Maximilian University of Munich, Munich, Bavaria, Germany |
| Nguyen       | Nghia      | H           | UC San Diego Health Department of Biomedical Informatics, University of California, San Diego, La Jolla, CA, USA;<br>Division of Gastroenterology, UC San Diego Health, La Jolla, CA, USA                                                                             |
| Nick         | Anderson   |             | School of Medicine, Department of Public Health Sciences, Health Informatics Division, University of California, Davis Health, Sacramento, CA, USA                                                                                                                    |
| Niedermayer  | Sebastian  |             | LMU Klinikum, Department of Anaesthesiology, Ludwig Maximilian University of Munich, Munich, Bavaria, Germany                                                                                                                                                         |
| Ohno-Machado | Lucila     |             | UC San Diego Health Department of Biomedical Informatics, University of California, San Diego, La Jolla, CA, USA;<br>Veteran Affairs San Diego Healthcare System, San Diego, CA, USA.                                                                                 |
| Park         | Eunice     |             | Enterprise Information Services, Cedars Sinai Medical Center, Los Angeles, CA, USA                                                                                                                                                                                    |
| Paul         | Paulina    |             | UC San Diego Health Department of Biomedical Informatics, University of California, San Diego, La Jolla, CA, USA                                                                                                                                                      |
| Perkins      | Amy        | M           | Department of Biostatistics, Vanderbilt University Medical Center, Nashville, TN, USA;<br>GRECC, Tennessee Valley Healthcare System, Nashville, TN, USA                                                                                                               |
| Pletcher     | Mark       | J           | Department of Epidemiology and Biostatistics, University of California, San Francisco, San Francisco, CA, USA                                                                                                                                                         |
| Post         | Kai        | W           | UC San Diego Health Department of Biomedical Informatics, University of California, San Diego, La Jolla, CA, USA                                                                                                                                                      |
| Rieder       | Clemens    |             | LMU Klinikum, Department of Anaesthesiology, Ludwig Maximilian University of Munich, Munich, Bavaria, Germany                                                                                                                                                         |
| Scherer      | Clemens    |             | LMU Klinikum, Medizinische Klinik und Poliklinik I, Ludwig Maximilian University of Munich, Munich, Bavaria 81377, Germany                                                                                                                                            |
| Schilling    | Lisa       | M           | Data Science to Patient Value Program, University of Colorado Anschutz Medical Campus, Aurora, CO, USA                                                                                                                                                                |
| Soares       | Andrey     |             | Data Science to Patient Value Program, University of Colorado Anschutz Medical Campus, Aurora, CO, USA                                                                                                                                                                |
| SooHoo       | Spencer    |             | Division of Informatics, Department of Biomedical Sciences, Cedars Sinai Medical Center, Los Angeles, CA, USA                                                                                                                                                         |

| Last Name | First Name | Middle Name | Affiliation(s)                                                                                                                              |
|-----------|------------|-------------|---------------------------------------------------------------------------------------------------------------------------------------------|
| Soysal    | Ekin       |             | School of Biomedical Informatics, The University of Texas Health Science Center at Houston, Houston, TX, USA                                |
| Steven    | Covington  |             | IT Health Informatics, University of California Davis Health, Sacramento, CA, USA                                                           |
| Tep       | Brian      |             | Enterprise Information Services, Cedars Sinai Medical Center, Los Angeles, CA, USA                                                          |
| Toy       | Brian      |             | University of Southern California, Keck School of Medicine, Los Angeles, CA, USA                                                            |
| Wang      | Baocheng   |             | LMU Klinikum, Department of Anaesthesiology, Ludwig Maximilian University of Munich, Munich, Bavaria, Germany                               |
| Wu        | Zhen       | R           | IT Health Informatics, University of California, Davis Health, Sacramento, CA, USA                                                          |
| Xu        | Hua        |             | School of Biomedical Informatics, The University of Texas Health Science Center at Houston, Houston, TX, USA                                |
| Yong      | Choi       |             | School of Medicine, Department of Public Health Sciences, Health Informatics Division, University of California, Davis, Sacramento, CA, USA |
| Zheng     | Kai        |             | Department of Informatics, Donald Bren School of Information and Computer Sciences, University of California, Irvine, Irvine, CA, USA       |
| Zhou      | Yujia      |             | School of Biomedical Informatics, The University of Texas Health Science Center at Houston, Houston, TX, USA                                |
| Zucker    | Rachel     | A           | Data Science to Patient Value Program, University of Colorado Anschutz Medical Campus, Aurora, CO, USA                                      |
